# Supplementary material for: Differential Antibody Response against Conformational and Linear Epitopes of the L1 Proteins from Human Papillomavirus Types 16/18 Is Observed in Vaccinated Women or with Uterine Cervical Lesions
Source: MDPI journal article supplement (doi:10.3390/vaccines9050442), 2021-05-02
Supplement: s1 [file s1]

## Supplementary Table S1

### Validation of ELISA system to detect anti-VLPs and anti-L1 antibodies from HPV16/18.

| Population group                                        | VLPs Seropositivity |             | L1 Seropositivity |             |
|---------------------------------------------------------|---------------------|-------------|-------------------|-------------|
|                                                         | HPV16               | HPV18       | HPV16             | HPV18       |
| <i>Vaccinated vs Control</i> <sup>1</sup><br>(n= 36/50) | n= 41               | n= 22       | n= 33             | n= 28       |
| <i>Sensitivity</i>                                      | 100.0               | 61.1        | 88.9              | 69.4        |
| <i>Specificity</i>                                      | 100.0               | 98.0        | 100.0             | 100.0       |
| <i>Accuracy</i>                                         | 100.0               | 82.6        | 95.4              | 87.2        |
| <i>AUC</i> <sup>2</sup>                                 | <b>1.00</b>         | <b>0.79</b> | <b>0.94</b>       | <b>0.84</b> |

<sup>1</sup> Control, this is the group of young girls non-sexually active, and presumably HPV-naïve.

<sup>2</sup> AUC, Area under the ROC curve.

# Supplementary Figure S1

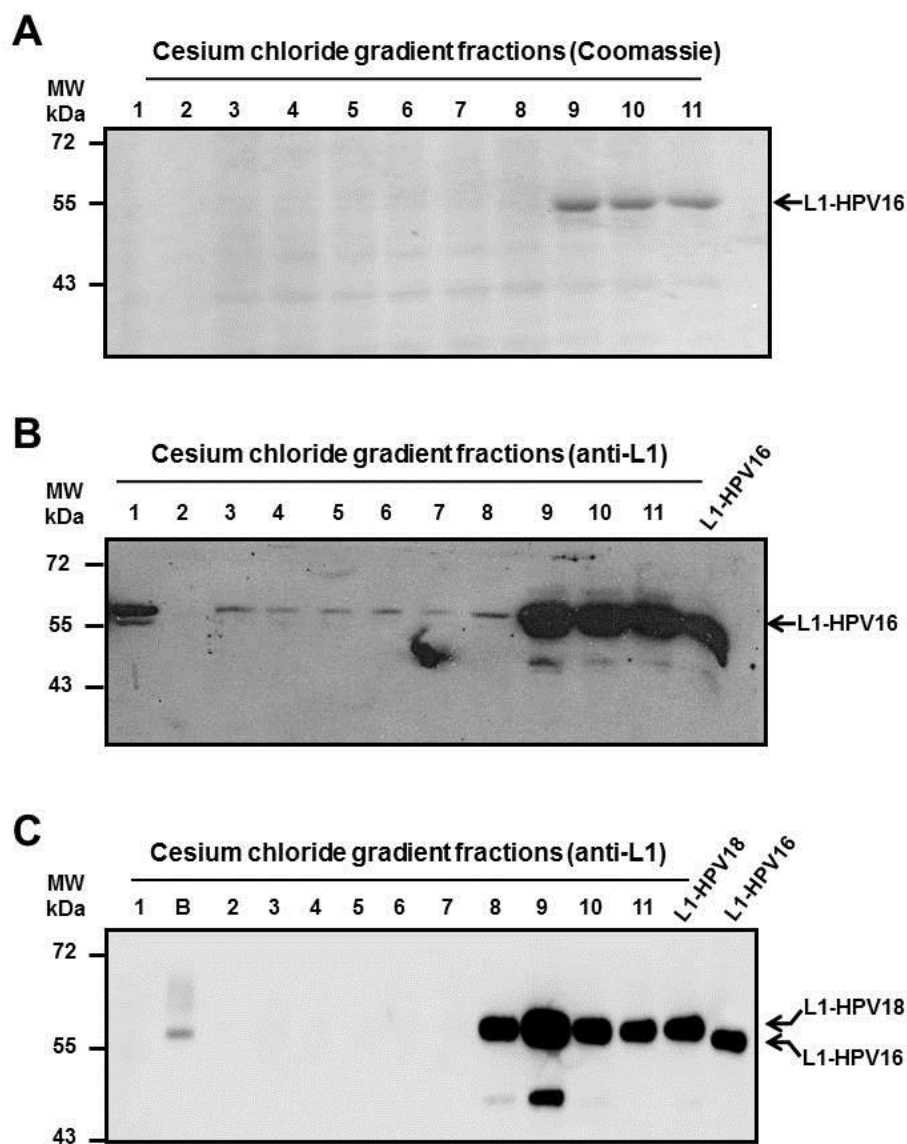

**Figure S1. Identification of HPV16-L1 and HPV18-L1 proteins from CsCl gradient fractions.** (A) Fractions from CsCl gradient of High Five cells infected with BACU-L1-16 were separated on a 10 % acrylamide gel and Coomassie blue stained to visualize protein purity. The L1 proteins were visualized by Western blot in the different gradient fractions using an anti-L1 mouse monoclonal antibody (dil. 1:2000) (DAKO) that recognized the L1 proteins from HPV16 (B) and HPV18 (C). The specific antibody complex was developed by chemiluminescence and membranes exposed to X-OMAT film. Arrows show the specific L1 proteins.

## Supplementary Figure S2

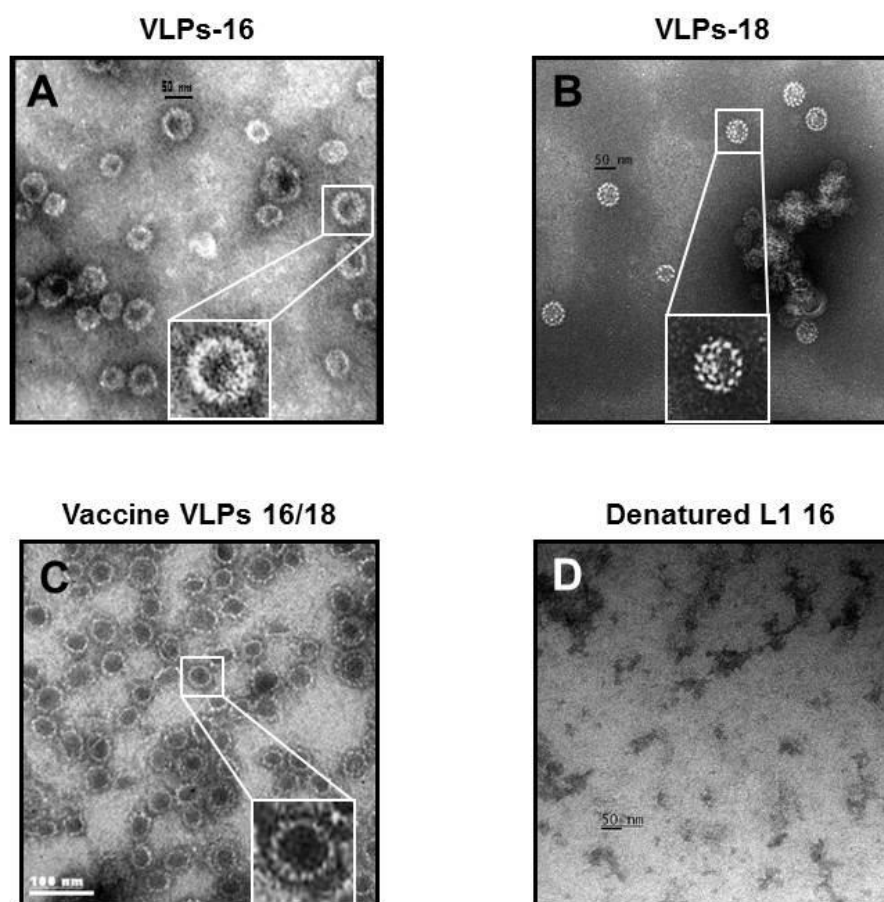

**Figure S2.** Electron micrographs of VLPs from HPV16/18 produced in baculovirus. Purified CsCl gradient VLPs 16/18 were prepared for TEM as described under Material and Methods and photographed at a magnification of  $\times 25,000$  and  $\times 14,000$ . (A) Purified VLPs from HPV16; (B) VLPs from HPV18; (C) VLPs-16/18 from HPV vaccine were used as a positive control. (D) Denatured L1 was obtained (monomers and aggregates) by treatment of VLPs with carbonate buffer (pH 9.6) for 16 h at 40 C. Scale bars: A, B, and D, 50 nm; C, 100 nm.
